# Supplementary material
Source: Springer Nature journal article supplement (https://www.springermedizin.de/resource/supplementary/12913_2007_577_MOESM3_ESM.pdf/9535904)
Supplement: MOESM3 [file 9535904]

Table 2: secondary outcome measures

| Outcome measure                                            | Instrument                                                             | Analysis   |
|------------------------------------------------------------|------------------------------------------------------------------------|------------|
|                                                            | (Number of items, reference, validated yes/no)                         |            |
| Perception of own health behavior                          | 1 item for each primary lifestyle outcome; question with 5-point scale | mean       |
| Attitude towards behaviour change                          | 1 item for each primary lifestyle outcome; question with 5-point scale | mean       |
| Self-efficacy about specific behaviour change              | 1 item for each primary lifestyle; question with 5-point scale         |            |
| Risk perception                                            | 2 items; [63]                                                          | mean       |
| Anxiety                                                    | 2 items; [46]                                                          | proportion |
| Satisfaction with communication and confidence in decision | 20 items; (COMRADE) [64]                                               | mean       |
